# Supplementary material for: Crystal water intercalated interlayer expanded MoS2 nanosheets as a cathode for efficient zinc-ion storage
Source: Royal Society of Chemistry journal article supplement (doi:10.1039/d3dt02001k), 2023-01-01
Supplement: d3dt02001k1.pdf [file d3dt02001k1.pdf]

**Supplementary material for**

**Crystal Water Intercalated Interlayer Expanded MoS<sub>2</sub> Nanosheets as  
Cathode for Efficient Zinc-Ion Storage**

Muruganandham Hariram<sup>a</sup>, Manoj Kumar<sup>a</sup>, Kamlendra Awasthi<sup>a</sup>, Debasish Sarkar<sup>\*a</sup>,  
Prashanth W. Menezes<sup>\*bc</sup>

<sup>a</sup> Department of Physics, Malaviya National Institute of Technology Jaipur, Rajasthan-302017,  
India. E-mail: [deb.sarkar1985@gmail.com](mailto:deb.sarkar1985@gmail.com), [debasish.phy@mnit.ac.in](mailto:debasish.phy@mnit.ac.in)

<sup>b</sup> Material Chemistry Group for Thin Film Catalysis – CatLab, Helmholtz-Zentrum Berlin für  
Materialien und Energie, Albert-Einstein-Str. 15, 12489 Berlin, Germany. E-mail:  
[prashanth.menezes@helmholtz-berlin.de](mailto:prashanth.menezes@helmholtz-berlin.de)

<sup>c</sup> Department of Chemistry, Technical University of Berlin, Straße des 17 Juni 135. Sekr. C2,  
10623, Berlin, Germany. E-mail: [prashanth.menezes@mailbox.tu-berlin.de](mailto:prashanth.menezes@mailbox.tu-berlin.de)

## Calculation details

### (i) Segregation of Capacitive and Diffusive parts from CV:

To evaluate the charge storage mechanism of ZIBs, current ( $i$ ) and scan rate ( $v$ ) is analyzed from the CV curve by using the following reaction:

$$i = av^b \quad (S1)$$

Here  $a$  and  $b$  are variable parameters. The value of  $b$  can be calculated by the slope of  $\log i$  versus  $\log v$  plot, which provides the charge storage kinetics. If the value of  $b$  is 1, the capacitive process is dominating, while the diffusive process is dominating when  $b$  is 0.5. For segregating the capacitive and diffusive currents, the following formula is used.

$$i(V) = a_1v + a_2v^{\frac{1}{2}} \quad (S2)$$

Here  $i$  and  $v$  are the current and scan rates. The values of  $a_1$  and  $a_2$  are calculated by finding the slope and intercept of the  $i(V)/v^{1/2}$  versus the  $v^{1/2}$  plot.

### (ii) Calculation of diffusion co-efficient from GITT:

For GITT studies, the cell was charged/discharged for 8 mins and rested for 32 mins. The diffusion coefficient of Zn-ions ( $D_{Zn}$ ) can be calculated by the following equation:

$$D_{Zn} = \frac{4}{\pi\tau} \left( \frac{m_B V_M}{M_B A} \right)^2 \left( \frac{\Delta E_s}{\Delta E_\tau} \right)^2 \quad (S3)$$

Here,  $\tau$  is the time of charging/discharging (s),  $m_B$  is the active mass loading (g),  $V_M$  is the molar volume of  $\text{MoS}_2$  ( $\text{cm}^3/\text{mol}$ ),  $M_B$  is the molecular weight of  $\text{MoS}_2$  (g/mol) and  $A$  is the electrode/electrolyte contact area ( $\text{cm}^2$ ). Moreover,  $\Delta E_\tau$  and  $\Delta E_s$  are the variations of cell voltage and steady-state voltage, respectively.

***(iii) Calculation of diffusion co-efficient from EIS:***

$D_{Zn}$  can also be calculated using EIS spectra by using the equation S4. In the equation, R represents the gas constant (8.314 J/mol/K), T represents the absolute temperature (-273.15 K), A is the electrode/electrolyte contact area ( $\text{cm}^2$ ), n is the number of electrons transferred during the electrochemical process (1.18 in this system), F is the Faraday constant (96500 C/mol), C is the concentration of Zn (calculated to be  $1.84 \times 10^{-2} \text{ mol/cm}^3$ ), and  $\sigma$  is the Warburg factor (slope of  $Z'$  vs.  $\omega^{-1/2}$  plot)

$$D_{Zn} = \frac{R^2 T^2}{2A^2 n^4 F^4 C^2 \sigma^2} \quad (\text{S4})$$

***(iv) Calculation of Zn-ions concentration:***

Unit cell volume of  $\text{MoS}_2$  is determined by “a (3.16 Å) × b (3.16 Å) × c (12.29 Å) ×  $\sin 120^\circ = 106.28 \times 10^{-24} \text{ cm}^3$ ”. 1  $\text{cm}^3$  of  $\text{MoS}_2$  have  $1/106.28 \times 10^{-24} = 9.41 \times 10^{21}$  unit cells. In our case, ZIB shows the maximum specific capacity of 197 mAh/g, which signifies 0.59  $\text{Zn}^{2+}$  insertion in  $\text{MoS}_2$  ( $\text{Zn}_{0.59}\text{MoS}_2$ ). Each molecule of  $\text{MoS}_2$  has 0.59 Zn ions and each unit cell contains 2 molecules. Therefore, 1  $\text{cm}^3$  has  $(9.41 \times 10^{21}/6.02 \times 10^{23}) \times 2 \times 0.59 = 1.84 \times 10^{-2} \text{ mol Zn-ions}$ .

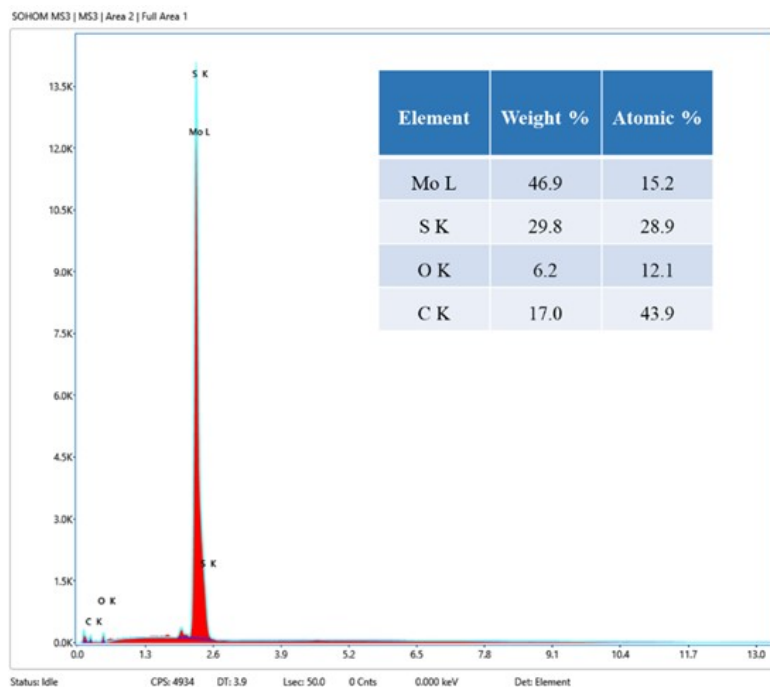

**Figure S1:** EDX spectra of the synthesized MoS<sub>2</sub> nanostructures

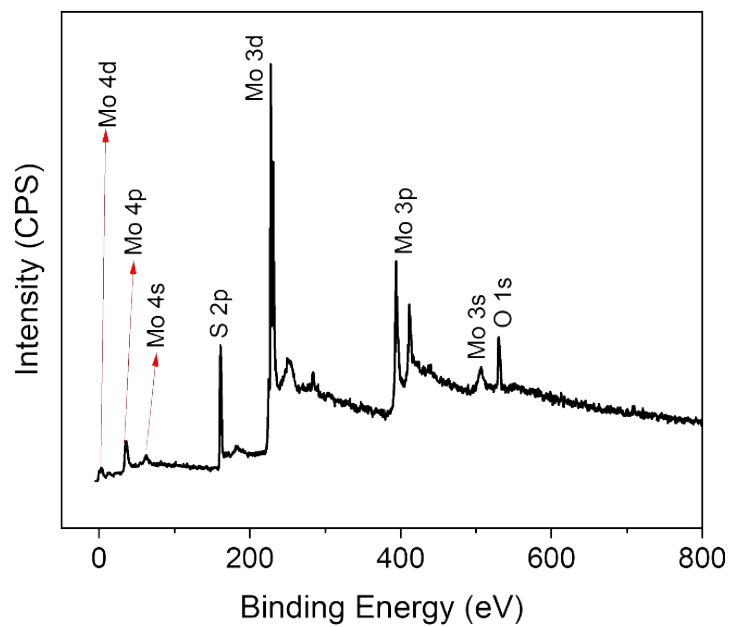

**Figure S2:** XPS survey spectra of the as-synthesized water intercalated MoS<sub>2</sub> nanostructures

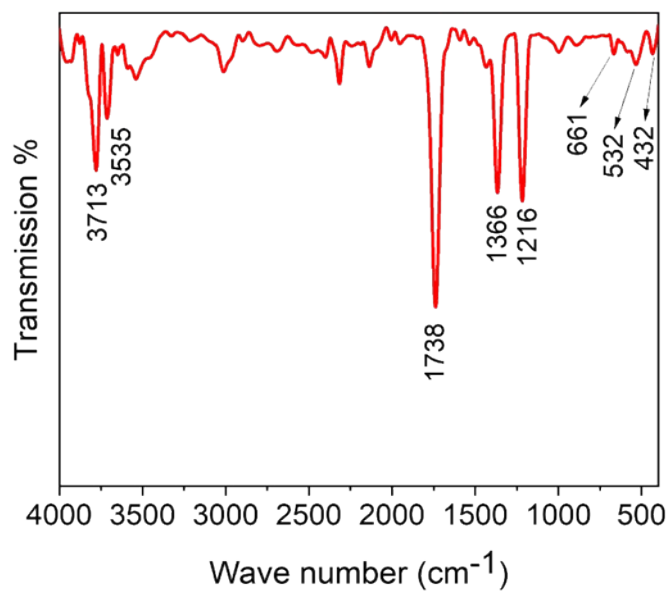

**Figure S3:** FTIR spectra of the synthesized MoS<sub>2</sub> nanostructures

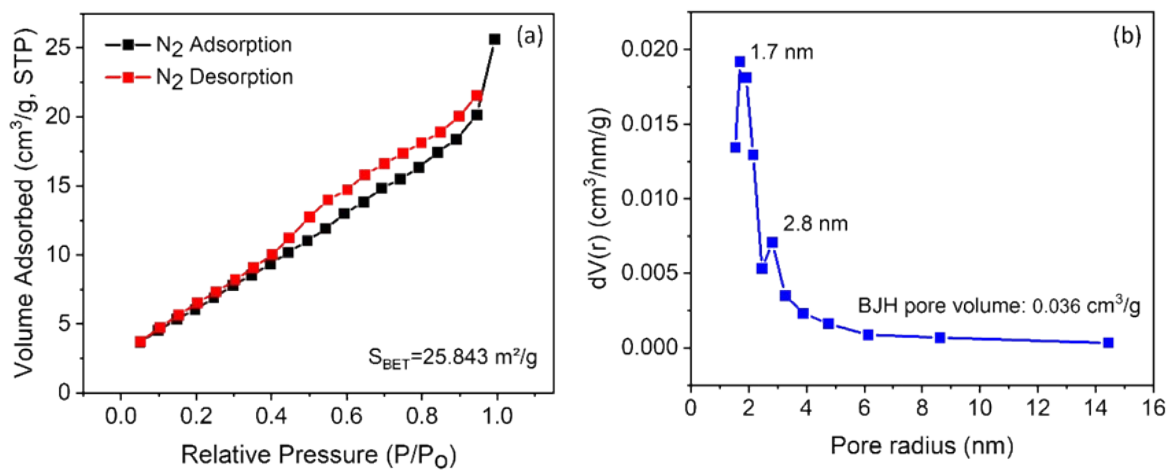

**Figure S4:** (a) N<sub>2</sub> adsorption-desorption isotherm and (b) BJH pore-size distribution plots of the MoS<sub>2</sub> nanosheets

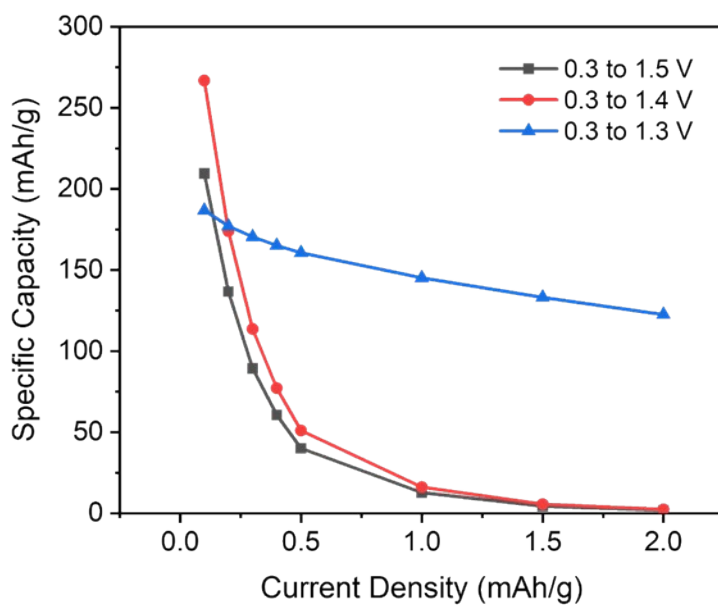

**Figure S5:** Specific capacity of the MoS<sub>2</sub> sample at different potential windows

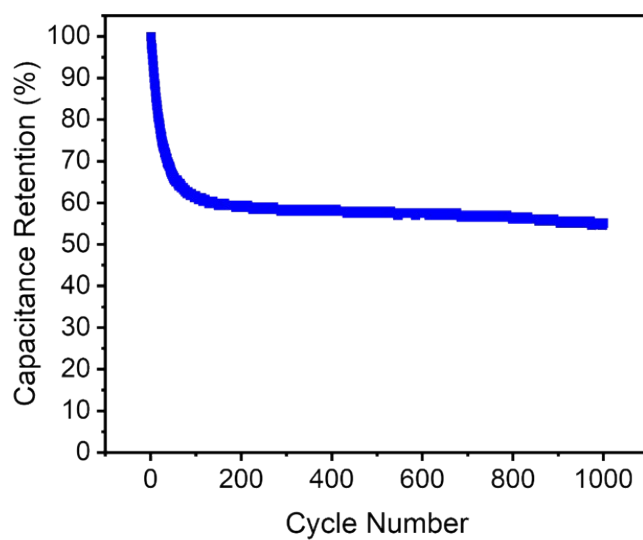

**Figure S6:** Cycling study of MoS<sub>2</sub> nanostructures for 1000 GCD cycles measured at 2 A/g

**Table S1:** Some key literature on MoS<sub>2</sub>-based cathode materials for ZIBs

| S. No. | Cathode Material                                  | Interlayer Spacing | Electrolyte                                               | Voltage          | Specific Capacity           | Cyclic Retention             | Ref.             |
|--------|---------------------------------------------------|--------------------|-----------------------------------------------------------|------------------|-----------------------------|------------------------------|------------------|
| 1      | MoS <sub>2</sub>                                  | -                  | 2 M ZnSO <sub>4</sub>                                     | 0.1-2 V          | 18 mAh/g at 0.05 A/g        | -                            | 1                |
| 2      | MoS <sub>2</sub>                                  | 7.3 Å              | 2 M ZnSO <sub>4</sub>                                     | 0.3-1.5 V        | 202.6 mAh/g at 0.1 A/g      | 98.6% after 600 cycles       | 2                |
| 3      | MoS <sub>2</sub> (~70% 1T)                        | -                  | 3 M Zn(CF <sub>3</sub> SO <sub>3</sub> ) <sub>2</sub>     | 0.25–1.25 V      | 168 mAh/g at 0.1 A/g        | 98.1% after 400 cycles       | 3                |
| 4      | MoS <sub>2-x</sub> (S-vacancy)                    | 6.86 Å             | 3 M Zn(CF <sub>3</sub> SO <sub>3</sub> ) <sub>2</sub>     | 0.25–1.25 V      | 138.6 mAh/g at 0.1 A/g      | 87.8% after 1000 cycles      | 4                |
| 5      | N-MoS <sub>2</sub>                                | 8.6 Å              | 3 M Zn(CF <sub>3</sub> SO <sub>3</sub> ) <sub>2</sub>     | 0.2-1.3 V        | 149.6 mAh/g at 0.1 A/g      | 89.1% after 1000 cycles      | 5                |
| 6      | 1T MoS <sub>2</sub> @CC                           | 6.7 Å              | 3 M Zn(CF <sub>3</sub> SO <sub>3</sub> ) <sub>2</sub>     | 0.25–1.25 V      | 198 mAh/g at 0.1 A/g        | 87.8% after 2000 cycles      | 6                |
| 7      | MoS <sub>2</sub> /CTAB                            | 10 Å               | 3 M ZnSO <sub>4</sub>                                     | 0.2-1.3 V        | 181.8 mA/g at 0.1 A/g       | ~92.8% after 2100 cycles     | 7                |
| 8      | MoS <sub>2</sub> -H <sub>2</sub> O                | 9.1 Å              | 3 M Zn(CF <sub>3</sub> SO <sub>3</sub> ) <sub>2</sub>     | 0.25-1.25 V      | 164.1 mAh/g at 0.1 A/g      | 83.1% after 100 cycles       | 8                |
| 9      | MWCNTs@amorphous carbon@MoS <sub>2</sub>          | 8.8 Å              | 3 M PVA-Zn(CF <sub>3</sub> SO <sub>3</sub> ) <sub>2</sub> | 0.13-1.2 V       | 181 mAh/g at 0.1 A/g        | 78% after 1000 cycles        | 9                |
| 10     | <b>Crystal water intercalated MoS<sub>2</sub></b> | <b>7.9 Å</b>       | <b>2 M ZnSO<sub>4</sub></b>                               | <b>0.3-1.3 V</b> | <b>197 mAh/g at 0.1 A/g</b> | <b>55% after 1000 cycles</b> | <b>This work</b> |

## References

1. W. Liu, J. Hao, C. Xu, J. Mou, L. Dong, F. Jiang, Z. Kang, J. Wu, B. Jiang and F. Kang, *Chem. Commun.*, 2017, **53**, 6872-6874.
2. H. Li, Q. Yang, F. Mo, G. Liang, Z. Liu, Z. Tang, L. Ma, J. Liu, Z. Shi and C. Zhi, *Energy Storage Mater.*, 2019, **19**, 94-101.
3. J. Liu, P. Xu, J. Liang, H. Liu, W. Peng, Y. Li, F. Zhang and X. Fan, *Chem. Eng. J.*, 2020, **389**, 124405.
4. W. Xu, C. Sun, K. Zhao, X. Cheng, S. Rawal, Y. Xu and Y. Wang, *Energy Storage Mater.*, 2019, **16**, 527-534.
5. Z. Sheng, P. Qi, Y. Lu, G. Liu, M. Chen, X. Gan, Y. Qin, K. Hao and Y. Tang, *ACS Appl. Mater. Interfaces*, 2021, **13**, 34495-34506.
6. J. Liu, N. Gong, W. Peng, Y. Li, F. Zhang and X. Fan, *Chem. Eng. J.*, 2022, **428**, 130981.
7. Z. Yao, W. Zhang, X. Ren, Y. Yin, Y. Zhao, Z. Ren, Y. Sun, Q. Lei, J. Wang, L. Wang, T. Ji, P. Huai, W. Wen, X. Li, D. Zhu and R. Tai, *ACS Nano*, 2022, **16**, 12095-12106.
8. L. Liu, W. Yang, H. Chen, X. Chen, K. Zhang, Q. Zeng, S. Lei, J. Huang, S. Li and S. Peng, *Electrochim. Acta*, 2022, **410**, 140016.
9. F. Niu, Z. Bai, Y. Mao, S. Zhang, H. Yan, X. Xu, J. Chen and N. Wang, *Chem. Eng. J.*, 2023, **453**, 139933.
